# Supplementary material for: Cost-effectiveness evaluations of the 9-Valent human papillomavirus (HPV) vaccine: Evidence from a systematic review
Source: PubMed Central journal article supplement (PMC7266321; doi:10.1371/journal.pone.0233499), 2020-06-02

# PLOS ONE

## Mapping of cost-effectiveness evaluations of the 9-Valent human papillomavirus (HPV) vaccine: Evidence from a systematic review --Manuscript Draft--

|                                |                                                                                                                                                                                                                                                                                                                                                                                                                                                                                                                                                                                                                                                                                                                                                                                                                                                                                                                                                                                                                                                                                                                                                                                                                                                                                                                                                                                                                                                                                                                                                                                                                                                                                                                                                                                                                                                                                                                                                                                                                                                                                                                            |
|--------------------------------|----------------------------------------------------------------------------------------------------------------------------------------------------------------------------------------------------------------------------------------------------------------------------------------------------------------------------------------------------------------------------------------------------------------------------------------------------------------------------------------------------------------------------------------------------------------------------------------------------------------------------------------------------------------------------------------------------------------------------------------------------------------------------------------------------------------------------------------------------------------------------------------------------------------------------------------------------------------------------------------------------------------------------------------------------------------------------------------------------------------------------------------------------------------------------------------------------------------------------------------------------------------------------------------------------------------------------------------------------------------------------------------------------------------------------------------------------------------------------------------------------------------------------------------------------------------------------------------------------------------------------------------------------------------------------------------------------------------------------------------------------------------------------------------------------------------------------------------------------------------------------------------------------------------------------------------------------------------------------------------------------------------------------------------------------------------------------------------------------------------------------|
| <b>Manuscript Number:</b>      | PONE-D-19-28575                                                                                                                                                                                                                                                                                                                                                                                                                                                                                                                                                                                                                                                                                                                                                                                                                                                                                                                                                                                                                                                                                                                                                                                                                                                                                                                                                                                                                                                                                                                                                                                                                                                                                                                                                                                                                                                                                                                                                                                                                                                                                                            |
| <b>Article Type:</b>           | Research Article                                                                                                                                                                                                                                                                                                                                                                                                                                                                                                                                                                                                                                                                                                                                                                                                                                                                                                                                                                                                                                                                                                                                                                                                                                                                                                                                                                                                                                                                                                                                                                                                                                                                                                                                                                                                                                                                                                                                                                                                                                                                                                           |
| <b>Full Title:</b>             | Mapping of cost-effectiveness evaluations of the 9-Valent human papillomavirus (HPV) vaccine: Evidence from a systematic review                                                                                                                                                                                                                                                                                                                                                                                                                                                                                                                                                                                                                                                                                                                                                                                                                                                                                                                                                                                                                                                                                                                                                                                                                                                                                                                                                                                                                                                                                                                                                                                                                                                                                                                                                                                                                                                                                                                                                                                            |
| <b>Short Title:</b>            | Mapping of cost-effectiveness evaluations of the 9-Valent human papillomavirus (HPV) vaccine                                                                                                                                                                                                                                                                                                                                                                                                                                                                                                                                                                                                                                                                                                                                                                                                                                                                                                                                                                                                                                                                                                                                                                                                                                                                                                                                                                                                                                                                                                                                                                                                                                                                                                                                                                                                                                                                                                                                                                                                                               |
| <b>Corresponding Author:</b>   | Rashidul Alam Mahumud, MPH, MSc, PhD Fellow (Health Economics)<br>International Centre for Diarrhoeal Disease Research<br>Dhaka, Dhaka District BANGLADESH                                                                                                                                                                                                                                                                                                                                                                                                                                                                                                                                                                                                                                                                                                                                                                                                                                                                                                                                                                                                                                                                                                                                                                                                                                                                                                                                                                                                                                                                                                                                                                                                                                                                                                                                                                                                                                                                                                                                                                 |
| <b>Keywords:</b>               | Human papillomavirus; Cost-effectiveness evaluations; Incremental cost-effectiveness ratios; 9-Valent HPV vaccine; systematic review; cervical cancer; World Health Organization                                                                                                                                                                                                                                                                                                                                                                                                                                                                                                                                                                                                                                                                                                                                                                                                                                                                                                                                                                                                                                                                                                                                                                                                                                                                                                                                                                                                                                                                                                                                                                                                                                                                                                                                                                                                                                                                                                                                           |
| <b>Abstract:</b>               | <p><b>Introduction</b><br/>The World Health Organization (WHO) recommends that programs for human papillomavirus (HPV) vaccination are established to be cost-effective before implementation. HPV vaccination is WHO recommended for girls aged 9–13 years old due to the high burden of cervical cancer. This review examined evidence of the cost-effectiveness evaluation of the 9-valent HPV vaccine within a global context.</p> <p><b>Methods</b><br/>Searches were performed until 31 July 2019 using two databases: PubMed and Scopus. A combined checklist (i.e., WHO, Drummond and CHEERS) was used to examine the quality of eligible studies. A total of 12 studies were eligible for review and nearly all were conducted in developed countries.</p> <p><b>Results</b><br/>Despite some heterogeneity in approaches to measuring cost-effectiveness, ten studies concluded that 9vHPV vaccination was cost-effective while two studies were not. The addition of adolescent boys into immunisation program was cost effective when vaccine price and coverage was comparatively low. When vaccination coverage for female was more than 75%, gender neutral HPV vaccination was less cost-effective than when targeting only girls aged 9–18 years. Multi cohort immunization approach was cost-effective in the age range of 9–14 years but the upper age limit at which vaccination was no longer cost-effective requires to be further evaluated. Most dominating parameters determined were duration of vaccine protection, time horizon, vaccine price, coverage, healthcare costs, efficacy and discounting rates.</p> <p><b>Conclusions</b><br/>These findings are anticipated to support policy-makers in extending HPV immunization programs on either switching to the 9-valent vaccine or inclusion of adolescent boys' vaccination or extending the age of vaccination. Further, this review also supports extending vaccination to low-resource settings where vaccine prices are competitive, donor funding is offered, cervical cancer burden is high and screening options are limited.</p> |
| <b>Order of Authors:</b>       | <p>Rashidul Alam Mahumud, MPH, MSc, PhD Fellow (Health Economics)</p> <p>Khorshed Alam</p> <p>Syed Afroz Keramat</p> <p>Gail Ormsby</p> <p>Jeff Dunn</p> <p>Jeff Gow</p>                                                                                                                                                                                                                                                                                                                                                                                                                                                                                                                                                                                                                                                                                                                                                                                                                                                                                                                                                                                                                                                                                                                                                                                                                                                                                                                                                                                                                                                                                                                                                                                                                                                                                                                                                                                                                                                                                                                                                   |
| <b>Additional Information:</b> |                                                                                                                                                                                                                                                                                                                                                                                                                                                                                                                                                                                                                                                                                                                                                                                                                                                                                                                                                                                                                                                                                                                                                                                                                                                                                                                                                                                                                                                                                                                                                                                                                                                                                                                                                                                                                                                                                                                                                                                                                                                                                                                            |
| <b>Question</b>                | <b>Response</b>                                                                                                                                                                                                                                                                                                                                                                                                                                                                                                                                                                                                                                                                                                                                                                                                                                                                                                                                                                                                                                                                                                                                                                                                                                                                                                                                                                                                                                                                                                                                                                                                                                                                                                                                                                                                                                                                                                                                                                                                                                                                                                            |

## Financial Disclosure

Enter a financial disclosure statement that describes the sources of funding for the work included in this submission. Review the [submission guidelines](#) for detailed requirements. View published research articles from [PLOS ONE](#) for specific examples.

This statement is required for submission and **will appear in the published article** if the submission is accepted. Please make sure it is accurate.

### Unfunded studies

Enter: *The author(s) received no specific funding for this work.*

### Funded studies

Enter a statement with the following details:

- Initials of the authors who received each award
- Grant numbers awarded to each author
- The full name of each funder
- URL of each funder website
- Did the sponsors or funders play any role in the study design, data collection and analysis, decision to publish, or preparation of the manuscript?
- **NO** - Include this sentence at the end of your statement: *The funders had no role in study design, data collection and analysis, decision to publish, or preparation of the manuscript.*
- **YES** - Specify the role(s) played.

\* typeset

The author(s) received no specific funding for this work.

## Competing Interests

Use the instructions below to enter a competing interest statement for this submission. On behalf of all authors, disclose any [competing interests](#) that could be perceived to bias this work—acknowledging all financial support and any other relevant financial or non-financial competing interests.

This statement **will appear in the published article** if the submission is accepted. Please make sure it is

The authors have declared that no competing interests exist.

accurate. View published research articles from [PLOS ONE](#) for specific examples.

**NO authors have competing interests**

Enter: *The authors have declared that no competing interests exist.*

**Authors with competing interests**

Enter competing interest details beginning with this statement:

*I have read the journal's policy and the authors of this manuscript have the following competing interests: [insert competing interests here]*

\* typeset

**Ethics Statement**

Enter an ethics statement for this submission. This statement is required if the study involved:

- Human participants
- Human specimens or tissue
- Vertebrate animals or cephalopods
- Vertebrate embryos or tissues
- Field research

Write "N/A" if the submission does not require an ethics statement.

General guidance is provided below. Consult the [submission guidelines](#) for detailed instructions. **Make sure that all information entered here is included in the Methods section of the manuscript.**

Not applicable

**Format for specific study types**

**Human Subject Research (involving human participants and/or tissue)**

- Give the name of the institutional review board or ethics committee that approved the study
- Include the approval number and/or a statement indicating approval of this research
- Indicate the form of consent obtained (written/oral) or the reason that consent was not obtained (e.g. the data were analyzed anonymously)

**Animal Research (involving vertebrate animals, embryos or tissues)**

- Provide the name of the Institutional Animal Care and Use Committee (IACUC) or other relevant ethics board that reviewed the study protocol, and indicate whether they approved this research or granted a formal waiver of ethical approval
- Include an approval number if one was obtained
- If the study involved *non-human primates*, add *additional details* about animal welfare and steps taken to ameliorate suffering
- If anesthesia, euthanasia, or any kind of animal sacrifice is part of the study, include briefly which substances and/or methods were applied

**Field Research**

Include the following details if this study involves the collection of plant, animal, or other materials from a natural setting:

- Field permit number
- Name of the institution or relevant body that granted permission

**Data Availability**

Authors are required to make all data underlying the findings described fully available, without restriction, and from the time of publication. PLOS allows rare exceptions to address legal and ethical concerns. See the [PLOS Data Policy](#) and [FAQ](#) for detailed information.

Yes - all data are fully available without restriction

A Data Availability Statement describing where the data can be found is required at submission. Your answers to this question constitute the Data Availability Statement and **will be published in the article**, if accepted.

**Important:** Stating 'data available on request from the author' is not sufficient. If your data are only available upon request, select 'No' for the first question and explain your exceptional situation in the text box.

Do the authors confirm that all data underlying the findings described in their manuscript are fully available without restriction?

**Describe where the data may be found in full sentences. If you are copying our sample text, replace any instances of XXX with the appropriate details.**

N/A

- If the data are **held or will be held in a public repository**, include URLs, accession numbers or DOIs. If this information will only be available after acceptance, indicate this by ticking the box below. For example: *All XXX files are available from the XXX database (accession number(s) XXX, XXX).*
- If the data are all contained **within the manuscript and/or Supporting Information files**, enter the following: *All relevant data are within the manuscript and its Supporting Information files.*
- If neither of these applies but you are able to provide **details of access elsewhere**, with or without limitations, please do so. For example:

*Data cannot be shared publicly because of [XXX]. Data are available from the XXX Institutional Data Access / Ethics Committee (contact via XXX) for researchers who meet the criteria for access to confidential data.*

*The data underlying the results presented in the study are available from (include the name of the third party*

|                                                                                                                                                                                                                                         |                                                                                                                                     |
|-----------------------------------------------------------------------------------------------------------------------------------------------------------------------------------------------------------------------------------------|-------------------------------------------------------------------------------------------------------------------------------------|
| <p><i>and contact information or URL).</i></p> <ul style="list-style-type: none"><li>• This text is appropriate if the data are owned by a third party and authors do not have permission to share the data.</li></ul> <p>* typeset</p> |                                                                                                                                     |
| Additional data availability information:                                                                                                                                                                                               | Tick here if your circumstances are not covered by the questions above and you need the journal's help to make your data available. |

1 ***Mapping of cost-effectiveness evaluations of the 9-Valent***  
2 ***human papillomavirus (HPV) vaccine: Evidence from a***  
3 ***systematic review***

4  
5 Rashidul Alam Mahumud<sup>1\*,2,3</sup>, Khorshed Alam<sup>1,2</sup>, Syed Afroz Keramat<sup>1,2,5</sup>, Gail Ormsby<sup>6</sup>, Jeff  
6 Dunn<sup>1,7,8</sup>, Jeff Gow<sup>1,2,9</sup>  
7

8 **Author Affiliations**

9 <sup>1</sup>Health Economics and Policy Research, Centre for Health, Informatics and Economic  
10 Research, University of Southern Queensland, Toowoomba, Queensland-4350, Australia  
11

12 <sup>2</sup>School of Commerce, University of Southern Queensland, Toowoomba, QLD-4350  
13 Australia  
14

15  
16 <sup>3</sup>Health Economics and Financing Research, Health Systems and Population Studies  
17 Division, International Centre for Diarrhoeal Disease Research, Bangladesh (icddr,b),  
18 Dhaka-1212, Bangladesh.  
19

20 <sup>4</sup>Health and Epidemiology Research, Department of Statistics, University of Rajshahi-6205,  
21 Bangladesh  
22

23 <sup>5</sup>Economics Discipline, School of Social Science, University of Khulna, Khulna-9208,  
24 Bangladesh.

25 <sup>6</sup>School of Health and Wellbeing, University of Southern Queensland, Toowoomba,  
26 Queensland-4350, Australia.  
27

28 <sup>7</sup>Cancer Research Centre, Cancer Council Queensland, Fortitude Valley 4006, QLD,  
29 Australia.  
30

31 <sup>8</sup>Prostate Cancer Foundation of Australia, St Leonards NSW 2065, Australia

32 <sup>9</sup>School of Accounting, Economics and Finance, University of KwaZulu-Natal, Durban,  
33 4000, South Africa  
34

35 **\*Corresponding author:**

36 Health Economics and Policy Research, Centre for Health, Informatics and Economic  
37 Research, Faculty of Business, Education, Law and Arts, University of Southern Queensland,  
38 Toowoomba, Queensland-4350, Australia. ORCID: 0000-0001-9788-1868

39 E-mail: [rashed.mahumud@usq.edu.au](mailto:rashed.mahumud@usq.edu.au); [rashidul.icddr@gmail.com](mailto:rashidul.icddr@gmail.com); Phone: +61746875657  
40

41 **Acknowledgements**

42 The study is part of the first author's PhD research works. The PhD program was funded by  
43 the University of Southern Queensland, Australia. We would like to gratefully acknowledge  
44 the study participants and reviewers and editors of our manuscript.

# 1 **Abstract**

## 2 **Introduction**

3 The World Health Organization (WHO) recommends that programs for human papillomavirus  
4 (HPV) vaccination are established to be cost-effective before implementation. HPV  
5 vaccination is WHO recommended for girls aged 9–13 years old due to the high burden of  
6 cervical cancer. This review examined evidence of the cost-effectiveness evaluation of the 9-  
7 valent HPV vaccine within a global context.

## 8 **Methods**

9 Searches were performed until 31 July 2019 using two databases: PubMed and Scopus. A  
10 combined checklist (i.e., WHO, Drummond and CHEERS) was used to examine the quality of  
11 eligible studies. A total of 12 studies were eligible for review and nearly all were conducted in  
12 developed countries.

## 13 **Results**

14 Despite some heterogeneity in approaches to measuring cost-effectiveness, ten studies  
15 concluded that 9vHPV vaccination was cost-effective while two studies were not. The addition  
16 of adolescent boys into immunisation program was cost effective when vaccine price and  
17 coverage was comparatively low. When vaccination coverage for female was more than 75%,  
18 gender neutral HPV vaccination was less cost-effective than when targeting only girls aged 9–  
19 18 years. Multi cohort immunization approach was cost-effective in the age range of 9–14 years  
20 but the upper age limit at which vaccination was no longer cost-effective requires to be further  
21 evaluated. Most dominating parameters determined were duration of vaccine protection, time  
22 horizon, vaccine price, coverage, healthcare costs, efficacy and discounting rates.

## 23 **Conclusions**

24 These findings are anticipated to support policy-makers in extending HPV immunization  
25 programs on either switching to the 9-valent vaccine or inclusion of adolescent boys'  
26 vaccination or extending the age of vaccination. Further, this review also supports extending  
27 vaccination to low-resource settings where vaccine prices are competitive, donor funding is  
28 offered, cervical cancer burden is high and screening options are limited.

29



# 1 **Introduction**

2 Cervical cancer (CC) is both a leading cancer and the leading cause of cancer deaths in women  
3 globally [1]. Approximately 570,000 new cases of CC were diagnosed in 2018, composing  
4 6.6% of all cancers in women [1]. The burden of CC is an alarming issue worldwide, especially  
5 in low- and middle-income countries (LMICs). Approximately 85% of CC cases and 90% of  
6 deaths from CC occur in LMICs [1]. Persistent infections with human papillomavirus (HPV)  
7 are a key cause of CC and is an established carcinogen of CC [2]. HPV is predominantly  
8 transmitted to reproductive-aged women through sexual contact [3]. Most HPV infections are  
9 transient and can be cleared up within a short duration, usually a few months after their  
10 acquisition. However, untreated HPV infections can continue and evolve into cancer in some  
11 cases. There are more than 100 types of HPV infections, and high-risk types develop into CC  
12 [4]. Thirteen high-risk HPV genotypes are known to be predominantly responsible for  
13 malignant and premalignant lesions of the anogenital area [5], and these are the leading causes  
14 of most aggressive CC [6]. Further, HPV is also responsible for the majority of anogenital  
15 cervical cancers, including anal cancers (88%), vulvar cancers (43%), invasive vaginal  
16 carcinomas (70%), and all penile cancers (50%) globally [4].

17 The burden of CC (i.e., high incidence and mortality rates) globally is preventable through the  
18 implementation of a primary prevention strategy such as vaccination [1]. There are vaccines  
19 that can protect common cancer-causing types of HPV and reduce the risk of CC significantly.  
20 Three types of HPV vaccines, namely bivalent (Cervarix), quadrivalent (Gardasil) and 9-valent  
21 vaccine (Gardasil-9), are currently available in the market. Unfortunately, as of March 2017,  
22 only 71 countries (37% of all countries) have introduced HPV vaccines in their national  
23 immunization programs for girls, and 11 countries (6%) for both sexes [2]. The first global  
24 recommendation on HPV vaccination was proposed by the World Health Organization's  
25 Strategic Advisory Group of Experts on Immunization in October 2008 [7], whereby HPV

1 vaccination was recommended for girls aged 9–13 years old. This recommendation was  
2 updated in April 2014 [8], with the emphasis to include extended 2-dose HPV immunization  
3 for girls aged 9–14 years, who were not immunocompromised. With the recent licensing of the  
4 9-valent vaccine and the introduction of various HPV vaccination strategies, an update on the  
5 current recommendations of HPV vaccination are inevitable. The goals of the immunisation  
6 program are to reduce the acquisition and spread of HPV infections and to achieve optimum  
7 coverage through effective delivery systems. According to the underlying distribution of HPV  
8 infection types of CC, the 9vHPV vaccine builds population-level strong immunity against  
9 HPV-6, 11, 16, 18, 31, 33, 45, 52, and 58 infections [5] that cumulatively contribute  
10 approximately 89% of all CCs globally [9]. Considering the primary prevention of HPV  
11 infection, the 9vHPV vaccine is expected to reduce by an additional 10% the lifetime risk of  
12 diagnosis with CC in immunised cohorts compared with the 4vHPV vaccine and reduce CC by  
13 an additional 52% in non-vaccinated cohorts [10].

14 This review aims to update current evidence on the economic viability of HPV vaccination. In  
15 addition, this study aims to examine the cost-effectiveness of the 9-valent vaccine when boys  
16 are included and when age cohorts are varied, all within a global context. This review may be  
17 used as comprehensive evidence of general trends on the ongoing cost-effectiveness evaluation  
18 of HPV vaccine.

## 19 **Materials and methods**

### 20 *Study design*

21 Published original academic literature that examined the cost-effectiveness of 9vHPV  
22 vaccination were included in this systematic review. A wide type of study perspectives  
23 including societal and health systems perspectives were included. A search strategy was  
24 adopted considering all countries regardless of perspective or vaccine delivery strategy. A  
25 combined WHO [11], Drummond [12] and CHEERS [13] checklist was used to evaluate the  
26 quality of included studies.

## 1 ***Search strategy and sources***

2 The literature search was performed by searching Scopus and PubMed to identify relevant  
3 articles following the inclusion criteria. Search inclusion terms included ‘economic  
4 evaluation’, ‘cost-effectiveness’, ‘analysis’, ‘human papillomavirus’, ‘HPV’, ‘vaccine’,  
5 ‘vaccinated’, ‘vaccination’, ‘cervical cancer’, ‘non-valent’, ‘9 or nine-valent’.

## 6 ***Study selection***

7 Three authors of the review team independently examined the titles and abstracts of the articles  
8 that met the selection criteria. The existing academic literature in the cost-effectiveness of 9-  
9 *valent* HPV vaccination was searched. Exclusion of articles was based on: ‘not cost-  
10 effectiveness analyses’, ‘insufficient cost and cost-effectiveness related data’, or ‘not using  
11 nine-valent HPV vaccine’. Language restrictions were not applied.

## 12 ***Data checking***

13 The study strategy followed a number of checks to ensure consistency of approach, including  
14 a discussion about discrepancies within the study team. For each outcome and model input  
15 parameters, the authors identified the proportion of missing observations and compare them  
16 with data in the original publication. In addition, a range of checks was carried out for all  
17 included studies to ensure that all values were reasonable. Datasets were combined to form a  
18 new master dataset where model input assumptions and outcome-related parameters used in  
19 the original studies were included. Further, three authors independently assessed the analytical  
20 quality of the preliminary selected studies using appropriate tools for examining risk of bias.  
21 Disagreements on inclusions were resolved by discussion with a third review author.

## 22 ***Data extraction (selection and coding)***

23 The study selection process was conducted in line with the PRISMA guidelines [14]. Data  
24 extraction was performed to develop a comprehensive data matrix which summarises the study  
25 characteristics such as authors, settings, perspective, threshold, outcome-related parameters  
26 and other necessary information.

## 27 ***Strategy for data synthesis***

28 Two authors (RAM and SAK) independently reviewed the titles and abstract. Data from all  
29 eligible studies were extracted by the same two authors using a standardized data collection  
30 form. A matrix was developed to summarise the characteristics and findings of the studies.

1 Studies were characterized by incorporating four themes: (i) study used 9-valent HPV vaccine  
2 to examine the cost-effectiveness, (ii) target population demographic characteristics (e.g.,  
3 gender-neutral and multiple age cohort immunisation), (iii) study perspectives, model and  
4 economic level of each country, and (iv) model input and outcome-related parameters.

5 To compare findings across the selected studies, incremental cost-effectiveness ratios (ICERs)  
6 and standardized cost-effectiveness were outlined. In terms of standardized cost-effectiveness  
7 scenarios, these studies used the heuristic cost-effectiveness threshold guided by the WHO  
8 [15], wherein an intervention or program was evaluated to be cost-effective if the  
9 ICER/DALYs averted was less than three times a country's annual per capita Gross Domestic  
10 Product (GDP). Further, the WHO constructed three broad decision rules: (i) an intervention  
11 or program was recommended as very cost-effective if ICER/DALYs averted <1 time GDP  
12 threshold; (ii) cost-effective if ICER/DALYs averted  $\geq 1$  time GDP threshold and  $\leq 3$  times  
13 GDP threshold; and (iii) not cost-effective if ICER/DALYs averted >3 times GDP threshold  
14 [16]. Examining whether an ICER offered by any strategy signifies value for money requires  
15 comparison to a cost-effectiveness threshold (CET). The CET refers to the health effects  
16 foregone (i.e., opportunity costs) related to resources being devoted to an intervention and  
17 consequentially being unavailable for other health-care priorities. Policy makers should be  
18 willing to invest their limited resources in the strategy offering the greatest health gains. CETs  
19 for the country with the lowest income in the world, borderline low/low-middle income,  
20 borderline low-middle/upper-middle income, and borderline high-middle/high income were  
21 estimated to be 1% to 51% GDP per capita, 4% to 51%, 11% to 51%, and 32% to 59%,  
22 respectively [17].

23 The review showed evidence in terms of methodological and current practices of cost-  
24 effectiveness evaluation studies such as determination of study research questions; the study  
25 perspective adopted, the duration of vaccine protection, time horizon and discount rate;  
26 explanation of model performed for data analysis; model input assumptions behind the  
27 estimation of associated costs and outcome parameters; reporting of ICERs; most dominant  
28 parameters of sensitivity analysis; examination of study conclusions and recommendations as  
29 well as financial disclosure of the selected studies.

### 30 ***Study characteristics***

31 Four hundred and eighty one articles were yielded through the primary search, of which 78  
32 articles were discarded because of duplication. Fifty one articles were considered for full-text

1 review after screening by title and abstract. Of these, 12 articles were eligible for the final  
2 review (Table 1). Three hundred fifty-two articles were excluded from this study following the  
3 inclusion criteria. The reasons for exclusion were: conference abstract (n = 58), reviews or  
4 editorials or commentary (n = 160), not cost-effectiveness evaluations (n = 60), did not use 9-  
5 valent vaccine (4v-HPV, 2v-HPV; n = 72) and insufficient information (n = 2). Finally, 12  
6 articles were included in this review. The study selection procedure using the PRISMA flow  
7 method is shown in Figure 1.

8 <Insert Figure 1 and Table 1 in here>

### 9 ***Settings and funding***

10 Single country studies mostly focused on high-income settings [4,18–29] (Table 2). However,  
11 a single study was found that covered two low-income countries ( e.g., Kenya and Uganda)  
12 [30]. Eight studies were funded by research organisations [4,18,23,25–28,30], while two  
13 studies did not state funding sources [20,24]. The Bill and Melinda Gates Foundation was the  
14 sole funder of one study [30] and three studies were funded by the Centre for Disease Control  
15 (CDC) [20,25,28]. Further, five studies were conducted in United States [20,21,24,26,28], one  
16 study was conducted in each of Germany [27], Italy [4], China [22], Australia [29], Austria  
17 [18] and Canada [23]. Low resource countries mostly depend on external funding agency for  
18 HPV vaccine programs, hence these countries may have less impetus for cost-effectiveness  
19 studies to inform local decision making as priorities are driven by external considerations.

20 <Insert Table 2 in here>

### 21 ***Study questions and comparator***

22 Most studies (n = 8) investigated the cost-effectiveness of introducing HPV vaccination to  
23 preadolescent girls aged 12 or younger [4,18,19,22,23,26,28–30]. Four studies assessed  
24 vaccinating 12 years or older girls [20,21,24,27]. All studies investigated vaccination either as  
25 an addition to existing screening programs or (more commonly) as opportunistic preventive  
26 programs or none at all. Further, most studies considered a range of vaccination and screening  
27 options to find the most cost-effective combination.

### 28 ***Analytical model***

29 Nine studies used a dynamic economic model for examining the cost-effectiveness of HPV  
30 vaccination programs [4,18–22,24–29], two studies used a static model [23,30], and one study

1 used a Markov model for analytical exploration [22] (Table 2). However, some studies did not  
2 explicitly account for the pathologic transition from HPV acquisition to HPV-associated  
3 disease [4,20–22,29], pathologic transition [4,27] and herd immunity [18,20,21,23,24,28].

#### 4 ***Thresholds and perspectives***

5 In terms of the cost-effectiveness scenario, four studies used the heuristic cost-effectiveness  
6 threshold proposed by the WHO. These studies used either one or three times GDP per capita  
7 [22,23,28,30]. The majority of studies adopted their own local thresholds (e.g., willingness to  
8 pay) while three studies considered both thresholds of GDP per capita and willingness to pay  
9 [22,28,30]. Apart from these studies, seven studies undertook an evaluation from a societal  
10 perspective [20,21,23,26–28,30], and four studies utilised a health system perspective  
11 [4,22,24,29]. Several studies used a societal perspective and included all vaccination costs,  
12 relevant direct medical costs, and gains in quality and length of life without regard to who  
13 incurred the costs or who received the benefits (Table 2). However, these selected studies  
14 reported little about the indirect costs and productivity losses which are significant from a  
15 societal perspective.

#### 16 ***Vaccine coverage***

17 The assumptions on vaccine coverage are significant in influencing the potential impact of  
18 HPV vaccine on HPV related diseases. Four selected studies assumed a vaccination coverage  
19 rate of 90% or above [22,26,27,30]. The vaccine coverage might be varied in terms of study  
20 settings as well as from a gender point of view. Among the selected studies, three studies  
21 considered a vaccine coverage rates of 26-60% for females and 25-40% for males [18,20,21],  
22 and other three studies considered a 46-80% vaccine coverage rate [23,24,29]. Three studies  
23 grouped coverages based on gender, with vaccination coverage assumed for females (25-60%)  
24 and for males (11-40%) [20,21,28]. The remaining study did not specify the vaccine coverage  
25 rate to be used [28].

#### 26 ***Vaccine efficacy***

27 Most studies considered vaccine efficacy rate ranged from 95-100% against HPV infections  
28 except the study of Simms et al. (2016) [29], which considered a vaccine efficacy rate of only  
29 59%. The study conducted in two East African Countries (Kenya and Uganda) used a 100%  
30 vaccine efficacy rate in case of 9vHPV [30]. Most studies (n=10) used a 95% vaccine efficacy  
31 rate [4,18–28].

## 1 ***Number of vaccine dose and delivery route***

2 Eight studies used a three-dose schedule of nine-valent vaccine. Most studies (6/8) were  
3 conducted in developed countries [20–25,28,30] and the other two studies were conducted in  
4 low- and middle-income countries [22,30]. Further, one study conducted in the United States  
5 [25] used both 2- and 3-dose vaccines. Diverse vaccine delivery routes were evidenced across  
6 the studies. Nine studies used the vaccine delivery route of a national immunisation program  
7 for the target population [4,20–25,29,30]. Two studies conducted in Austria [18] and United  
8 States [28], used a universal immunisation strategy to deliver the vaccine. Only one cost-  
9 effectiveness exploration of 9vHPV vaccine was conducted in Germany [27] and it used a  
10 vaccine delivery route through social health insurance.

## 11 ***Duration of vaccine protection, herd effect and discounting rate***

12 Most studies (11/12) assumed lifelong vaccine protection while only one study assumed a  
13 shorter duration of protection of 20 years [23]. Half of the studies specified herd immunity due  
14 to vaccination [18,20,21,23,24,28]. The remaining six studies did not consider the indirect  
15 effect of vaccination. Regarding the discount rate, majority of the studies (11/12) used 3%  
16 discount rate, while one study considered a 5% discount rate to adjust for future values in terms  
17 of economic value and health [29].

## 18 ***Risk of bias and quality of included studies***

19 Risk of bias was examined using the Consensus Health Economic Criteria (CHEC) list, a  
20 checklist that can be used to critically evaluate published economic evaluations [31]. Table 3  
21 showed the extent to which the reviewed studies conformed with the standards for reporting  
22 economic evaluations based on the WHO guidance [11], Drummond [12] and CHEERS [13].  
23 All studies clearly identified the study question, intervention(s), and comparator(s). A  
24 relatively high proportion of studies reported their study perspectives (12/12; 100%), time  
25 horizon (12/12; 100%) and discounting rates (12/12; 100%). Most studies performed sensitivity  
26 analyses (11/12; 92%) to assess the robustness of their findings. Almost all studies also clearly  
27 described the measurements and the assumption behind the calculation costs (11/12, 92%). The  
28 choice of model used was justified in majority studies (12/12; 100%), as a high proportion of  
29 these studies adopted dynamic transmission model to capture herds immunity. The currency  
30 and price data were reported in most studies too (12/12; 100%). Ten (83%) out 12 studies  
31 disclosed their funding sources. However, only 8 studies (67%) reported the measurement of

1 effectiveness from synthesis-based estimates, either through the combination of several  
2 randomized trials or the use of systematic reviews.

3 <Insert Table 3 in here>

## 4 **Results**

5 Ten studies concluded that their evaluation of 9vHPV vaccination was found to be cost-  
6 effective (Table 4) while the remaining two studies did not find cost-effectiveness [20,21].  
7 Further, five studies exhibited a ‘very cost-effective’ decision [4,22,23,27,30] and four studies  
8 found ‘cost-savings’ [18,20,26,28]. In the context of high-income countries (e.g., Canada and  
9 Austria), introduction of 9vHPV vaccination was a cost-effective decision to prevent cervical  
10 cancer of adolescent girls, as the incremental cost of vaccine compared with 9vHPV vaccine  
11 was less than US\$23-US\$47. However, in low and middle-income countries (e.g., Kenya and  
12 Uganda), the ICER of 9-valent vaccine must not be priced over US\$8.40-US\$9.80 [23,30].  
13 Two USA studies concluded that the cost-effectiveness exploration of 9-valent vaccine was  
14 more likely to be ‘cost-saving’ regardless of cross-protection assumption [20,28]. Most studies  
15 used ‘quality-adjusted life year’ (QALYs) as the measurement unit of cost-effectiveness. In  
16 addition, selected studies explored the cost-effectiveness decision using WTP thresholds that  
17 depended on country settings. When country specific vaccine prices are used then the cost-  
18 effectiveness decision changes. For example, two studies conducted in the USA, considered  
19 two different vaccine prices per dose, US\$162.74 and US\$174, respectively. However, both  
20 studies confirmed that the introduction of 9-valent vaccine was not cost-effective using their  
21 model input assumptions. Four studies reported cost-effectiveness of 9-valent vaccine for  
22 gender-neutral approaches [18,20,24,28] and three studies found it a ‘cost-effective’ or ‘cost-  
23 saving’ decision [18,20,28]. The remaining eight studies suggested vaccinating girls only. In  
24 terms of key drivers of cost-effectiveness, several dominating parameters were identified in  
25 this review such as duration of vaccine protection [18,23,29], time horizon [21], vaccine price  
26 [4,20,21,23,24,27–29], healthcare costs [26], vaccine efficacy [23,26], vaccine coverage  
27 [23,26] and discounting rates [18,23,27,30].

28 <Insert Table 4 in here>

## 29 **Discussion**

30 The HPV vaccination is one of the cornerstones of CC prevention worldwide. This study  
31 explored the cost-effectiveness of 9-valent HPV vaccination, drawing on 12 cost-effectiveness



1 evaluations in order to inform and expand knowledge of the potential influence of the next  
2 generation of HPV vaccines. Most studies were conducted in developed countries while one  
3 study was performed in an LMIC. However, in the context of LMICs, the incidence of cervical  
4 cancer is an alarming public health concern, which warrants an increase in studies which can  
5 be extremely useful to influence local decision making [32]. The economic viability of gender-  
6 neutral 9-valent HPV vaccination was confirmed by three of the selected studies [18,20,28].  
7 Cost-effectiveness exploration depends on the coverage of vaccination from the perspective of  
8 gender. For example, if the vaccine coverage for female recipients is 80% or above, the  
9 majority of the anogenital CC include vulvar cancers, invasive vaginal carcinomas cancers in  
10 female could be prevented. As a result, introduction of 9-valent vaccination for boys is  
11 relatively less important compared with girls due to the high economic costs involved without  
12 the additional benefits gained as per the female population reduction in CC, both from the  
13 societal and health system perspectives. Therefore, achieving optimal coverage of vaccination  
14 in females should remain a priority. This is of primary significance for LMICs settings since it  
15 is more effective and economically viable to prevent CC in females. However, it is also  
16 important to note that past studies paid little attention to the broader benefits of vaccination  
17 among male cohorts to prevent penile, anal, and oropharyngeal cancers. Exclusion of these  
18 diseases related to males may undermine the effectiveness of reducing CC. Gender-neutral  
19 vaccination might have several benefits including herd protection for boys. Moreover, it may  
20 provide indirect protection to unvaccinated women and direct protection to homosexual men.  
21 Therefore, this vaccination strategy should be further considered in country-level  
22 immunization programs by underlining other parameters including disease burden, sexual  
23 behaviour in a country (e.g., homosexual intercourse), equity, budget impact, and affordability.  
24 Despite different methodologies and various assumptions, most studies were consistent in their  
25 conclusion that multiple age cohort vaccination was economically viable. Nevertheless, there  
26 was an upper age limit at which HPV vaccination was no longer cost-effective, and should be  
27 interpreted cautiously as several studies evaluated the cost-effectiveness in a single age range  
28 only and did not compare to the next age range in a progressive manner. Subsequently, this  
29 could result in an overestimation of the cut-off age range for vaccination. The protection  
30 duration from vaccination has a large impact on the cost-effectiveness of multi-cohort  
31 vaccination, with most studies assuming life-long protection. Therefore, the use of ICERs  
32 based on the conventional evaluation of 10-year protection may be more representative of real-  
33 life effectiveness rather than the use of ICER based on lifetime protection. The cost-

1 effectiveness of HPV vaccination is also dependent upon the levels of vaccine coverage,  
2 compliance, and vaccine price.

3 Most models presumed a high coverage of vaccination, e.g., assuming that 70% of the target  
4 population will receive full doses of vaccination. However, not everyone who initiates the  
5 vaccination completes full doses (i.e., two or three doses) within the recommended time frame.  
6 Therefore, cost-effectiveness evaluation may underestimate or overestimate the actual costs.  
7 The analytical model outcomes in terms of herd immunity is only hypothetical unless the  
8 coverage level increases among the study cohort. Further, it is also indeterminate how non-  
9 compliance may consequently influence vaccine efficacy, effectiveness and duration of  
10 protection [55]. Model input assumptions regarding the 9-valent vaccine price also influence  
11 the cost-effectiveness outcomes observed. Prices for 9-valent vaccine are currently not  
12 specified, particularly, in lower-income countries. Hence, the cost-effectiveness of 9-valent  
13 vaccine is still indeterminate and there is no exclusive evidence of greater cost-effectiveness  
14 than the older licensed HPV vaccines. In fact, HPV vaccination is only cost-effective under the  
15 assumption of the lowest price of 9-valent vaccine.

16 Therefore, once the 9-valent vaccine price is fixed, including support by the GAVI vaccine-  
17 alliance, reassessment of cost-effectiveness of 9-valent vaccine is necessary. Another model  
18 input assumption that may influence the cost-effectiveness is the inclusion or exclusion of herd  
19 immunity effects based on the type of model acceptance. Two studies [23,30] constituted the  
20 static model as an analytical exploration which did not confirm herd immunity effects.  
21 Generally, the cost-effectiveness evaluations of HPV vaccine should use a dynamic model for  
22 exploration because economic evaluations for primary prevention strategy should be  
23 determined by societal benefits (e.g., indirect impacts on population were not immunised)  
24 rather than individual demands [33]. However, the application of a static model in these two  
25 studies may underestimate or overestimate the benefits of vaccination. If an HPV vaccination  
26 program is exhibited to be cost-effective considering a static model for analytical exploration,  
27 it is anticipated to be even very cost-effective when a dynamic model is considered [33].

28 A cost-effectiveness threshold is commonly fixed so that the interventions or programs that  
29 appear to be a comparatively good or very good value for money can be determined. There are  
30 several types of threshold. The majority of the studies used the cost-effectiveness demand side-  
31 threshold (e.g. willingness-to-pay). In health-related explorations, a willingness-to-pay  
32 threshold signifies an evaluation of what a consumer of health care might be prepared to pay

1 for the health benefit – given other competing demands on that consumer’s resources. There  
2 are also supply-side thresholds that resource allocation mechanism takes into account. For  
3 example, estimates of health status are predetermined since when an insurance company or  
4 other provider spends some of its available budget on a new intervention it is therefore required  
5 to decrease its funding of previous interventions. In considering the choice of the type of cost-  
6 effectiveness threshold to use, the concept of opportunity cost may be the one most relevant to  
7 providers who are primarily concerned with using available resources to maximise  
8 improvements in health status. In considering the implementation of a new intervention,  
9 decision-makers need estimates of both the health that might be gained elsewhere through the  
10 alternative use of the resources needed for the new intervention and the health that is likely to  
11 be lost if the new intervention is not used.

12 This review has some limitations. The cost-effectiveness evaluation based on GDP based  
13 thresholds of 1–3 times of GDP per capita lacks country specificity and has little meaning for  
14 country-level decision making [34]. It is uncertain whether this threshold truly reflects the  
15 country’s affordability or societal willingness to pay for additional health gains. Additionally,  
16 GDP is originally intended to measure the experience of people residing in urban areas and  
17 thus, it may not actually reflect the experience of the entire population in a country, especially  
18 those living in rural areas. Apart from an economic standpoint, other factors should be  
19 considered for the national immunization program, such as budget availability, political issues,  
20 cultural influences and availability of healthcare workforce.

## 21 **Conclusions**

22 Current evidence does not show conclusive proof of greater cost-effectiveness of the new 9-  
23 valent vaccine. The inclusion of adolescent males in HPV vaccination programs is cost-  
24 effective if vaccine price or coverage of females is low and if the HPV-associated male diseases  
25 are also considered. Multiple age cohort vaccination strategy is likely to be cost-effective in  
26 the age range of 9–14 years, but the upper age limit at which HPV vaccination is no longer  
27 cost-effective needs to be further evaluated. Vaccine coverage, price, duration of protection  
28 and discount rates are important parameters for consideration in the uptake of HPV vaccination.  
29 Nonetheless, present study findings may be used as an evidence to policy-makers and  
30 healthcare providers in making recommendations for HPV national immunization programs on  
31 the new 9-valent vaccine or inclusion of adolescent boys’ vaccination or extending the age of

1 immunization, but it should not divert resources from vaccinating the primary target population  
2 of girls aged 12 years or from effective cervical cancer screening programs.

### 3 **References**

- 4 1. World Health Organization (WHO). National cancer control programmes: Cervical  
5 cancer statistics. 2019 [cited 29 Aug 2019]. Available:  
6 <https://www.who.int/cancer/prevention/diagnosis-screening/cervical-cancer/en/>
- 7 2. Forman D, Lortet-Tieulent J, de Martel C, Ferlay J, Franceschi S, Plummer M, et al.  
8 Global burden of human papillomavirus and related diseases. *Vaccine*. 2012;30: F12–  
9 F23. doi:10.1016/j.vaccine.2012.07.055
- 10 3. Centers for Disease Control (CDC). Genital HPV infection—fact sheet. Centers for  
11 disease control and prevention. 2015 [cited 14 Feb 2019]. Available:  
12 <http://www.cdc.gov/std/hpv/stdfact-hpv.htm>
- 13 4. Mennini FS, Bonanni P, Bianic F, Waure C, Baio G, Plazzotta G, et al. Cost-  
14 effectiveness analysis of the nine-valent HPV vaccine in Italy. *Cost Eff Resour Alloc*.  
15 2017;15: 1–14. doi:10.1186/s12962-017-0073-8
- 16 5. Guan P, Howell-Jones R, Li N, Bruni L, De Sanjosé S, Franceschi S, et al. Human  
17 papillomavirus types in 115,789 HPV-positive women: A meta-analysis from cervical  
18 infection to cancer. *Int J Cancer*. 2012;131: 2349–2359. doi:10.1002/ijc.27485
- 19 6. Li N, Franceschi S, Howell-Jones R, Snijders PJF, Clifford GM. Human  
20 papillomavirus type distribution in 30,848 invasive cervical cancers worldwide:  
21 Variation by geographical region, histological type and year of publication. *Int J*  
22 *Cancer*. 2011;128: 927–935. doi:10.1002/ijc.25396
- 23 7. World Health Organization (WHO). Human papillomavirus vaccines: WHO position  
24 paper. *Wkly Epidemiol Rec*. 2009;84: 118–131.
- 25 8. World Health Organization (WHO). Human papillomavirus vaccines: WHO position  
26 paper, October 2014. *Wkly Epidemiol Rec*. 2014;89: 465–491.
- 27 9. Serrano B, Alemany L, Tous S, Bruni L, Clifford GM, Weiss T, et al. Potential impact  
28 of a nine-valent vaccine in human papillomavirus related cervical disease. *Infect Agent*  
29 *Cancer*. 2012;7: 1–13. doi:10.1186/1750-9378-7-38
- 30 10. Simms KT, Laprise JF, Smith MA, Lew J Bin, Caruana M, Brisson M, et al. Cost-  
31 effectiveness of the next generation nonavalent human papillomavirus vaccine in the  
32 context of primary human papillomavirus screening in Australia: A comparative  
33 modelling analysis. *Lancet Public Heal*. 2016;1: e66–e75. doi:10.1016/S2468-  
34 2667(16)30019-6
- 35 11. Walker DG, Hutubessy R, Beutels P. WHO Guide for standardisation of economic  
36 evaluations of immunization programmes. *Vaccine*. 2010;28: 2356–2359.  
37 doi:10.1016/j.vaccine.2009.06.035
- 38 12. Drummond MF, Jefferson T. Guidelines for authors and peer reviewers of economic  
39 submissions to the BMJ. The BMJ economic evaluation working party. *BMJ*.  
40 1996;313: 275–83.

- 1 13. Husereau D, Drummond M, Petrou S, Carswell C, Moher D, Greenberg D, et al.  
2 Consolidated health economic evaluation reporting standards (CHEERS)-explanation  
3 and elaboration: A report of the ISPOR health economic evaluation publication  
4 guidelines good reporting practices task force. *Value Heal.* 2013;16: 231–250.  
5 doi:10.1016/j.jval.2013.02.002
- 6 14. Moher Bd, Liberati A, Tetzlaff J, Altman DG. Preferred reporting items for systematic  
7 reviews and meta-analyses: The PRISMA statement. *PLoS Med.* 2009;6: e1000097.  
8 doi:10.1371/journal.pmed.1000097
- 9 15. WHO Commission on Macroeconomics and Health. Macroeconomics and health:  
10 Investing in health for economic development. Report of the Commission on  
11 Macroeconomics and Health. 20 Avenue Appia, 1211 Geneva 27, Switzerland; 2001.  
12 Available: <http://whqlibdoc.who.int/publications/2001/924154550x.pdf>
- 13 16. Edejer TT-T, Baltussen R, Adam T, Hutubessy R, Acharya A, Evans D., et al. Making  
14 choices in health: WHO guide to cost-effective analysis. 20 Avenue Appia, 1211  
15 Geneva 27, Switzerland; 2003. Report No.: 9241546018.
- 16 17. Woods B, Reville P, Sculpher M, Claxton K. Country-level cost-effectiveness  
17 thresholds: Initial estimates and the need for further research. *Value Heal.* 2016;19:  
18 929–935. doi:10.1016/j.jval.2016.02.017
- 19 18. Boiron L, Joura E, Llargeron N, Prager B, Uhart M. Estimating the cost-effectiveness  
20 profile of a universal vaccination programme with a nine-valent HPV vaccine in  
21 Austria. *BMC Infect Dis.* 2016;16: 1–15. doi:10.1186/s12879-016-1483-5
- 22 19. Franco A, Barrull C, Perulero N, Torné A, San-Martin M, López N, et al.  
23 Epidemiologic and economic burden of HPV diseases in Spain: implication of  
24 additional 5 types from the 9-valent vaccine. *Infect Agent Cancer.* 2018;13: 1–10.  
25 doi:10.1186/s13027-018-0187-4
- 26 20. Chesson HW, Markowitz LE, Hariri S, Ekwueme DU, Saraiya M. The impact and  
27 cost-effectiveness of nonavalent HPV vaccination in the United States: Estimates from  
28 a simplified transmission model. *Hum Vaccines Immunother.* 2016;12: 1363–1372.  
29 doi:10.1080/21645515.2016.1140288
- 30 21. Chesson HW, Laprise JF, Brisson M, Markowitz LE. Impact and Cost-effectiveness of  
31 3 Doses of 9-Valent Human Papillomavirus (HPV) vaccine among US females  
32 previously vaccinated with 4-valent hpv vaccine. *J Infect Dis.* 2016;213: 1694–1700.  
33 doi:10.1093/infdis/jiw046
- 34 22. Mo X, Gai Tobe R, Wang L, Liu X, Wu B, Luo H, et al. Cost-effectiveness analysis of  
35 different types of human papillomavirus vaccination combined with a cervical cancer  
36 screening program in mainland China. *BMC Infect Dis.* 2017;17: 1–12.  
37 doi:10.1186/s12879-017-2592-5
- 38 23. Drolet M, Laprise JF, Boily MC, Franco EL, Brisson M. Potential cost-effectiveness of  
39 the nonavalent human papillomavirus (HPV) vaccine. *Int J Cancer.* 2014;134: 2264–  
40 2268. doi:10.1002/ijc.28541
- 41 24. Chesson HW, Meites E, Ekwueme DU, Saraiya M, Markowitz LE. Cost-effectiveness  
42 of nonavalent HPV vaccination among males aged 22 through 26 years in the United  
43 States. *Vaccine.* 2018;36: 4362–4368. doi:10.1016/j.vaccine.2018.04.071

- 1 25. Laprise JF, Drolet M, Boily MC, Jit M, Sauvageau C, Franco EL, et al. Comparing the  
2 cost-effectiveness of two- and three-dose schedules of human papillomavirus  
3 vaccination: A transmission-dynamic modelling study. *Vaccine*. 2014;32: 5845–5853.  
4 doi:10.1016/j.vaccine.2014.07.099
- 5 26. Laprise JF, Markowitz LE, Chesson HW, Drolet M, Brisson M. Comparison of 2-dose  
6 and 3-dose 9-valent human papillomavirus vaccine schedules in the United States: A  
7 cost-effectiveness analysis. *J Infect Dis*. 2016;214: 685–688.  
8 doi:10.1093/infdis/jiw227
- 9 27. Llargeron N, Petry KU, Jacob J, Bianic F, Anger D, Uhart M. An estimate of the public  
10 health impact and cost-effectiveness of universal vaccination with a 9-valent HPV  
11 vaccine in Germany. *Expert Rev Pharmacoeconomics Outcomes Res*. 2017;17: 85–98.  
12 doi:10.1080/14737167.2016.1208087
- 13 28. Brisson M, Laprise JF, Chesson HW, Drolet M, Malagón T, Boily MC, et al. Health  
14 and economic impact of switching from a 4-Valent to a 9-valent HPV vaccination  
15 program in the United States. *J Natl Cancer Inst*. 2016;108: 1–9.  
16 doi:10.1093/jnci/djv282
- 17 29. Simms KT, Laprise JF, Smith MA, Lew J Bin, Caruana M, Brisson M, et al. Cost-  
18 effectiveness of the next generation nonavalent human papillomavirus vaccine in the  
19 context of primary human papillomavirus screening in Australia: a comparative  
20 modelling analysis. *Lancet Public Heal*. 2016;1: e66–e75. doi:10.1016/S2468-  
21 2667(16)30019-6
- 22 30. Kiatpongsan S, Kim JJ. Costs and cost-effectiveness of 9-valent human papillomavirus  
23 (HPV) vaccination in two east african countries. *PLoS One*. 2014;9: 1–6.  
24 doi:10.1371/journal.pone.0106836
- 25 31. Evers S, Goossens M, de Vet H, van Tulder M, Ament A. Criteria list for assessment  
26 of methodological quality of economic evaluations: Consensus on Health Economic  
27 Criteria. *Int J Technol Assess Health Care*. 2005;21: 240–245.  
28 doi:10.1017/s0266462305050324
- 29 32. Thiboonboon K, Santatiwongchai B, Chantarastapornchit V, RattanaVIPapong W,  
30 Teerawattananon Y. A systematic review of economic evaluation methodologies  
31 between resource-limited and resource-rich countries: A case of rotavirus vaccines.  
32 *Appl Health Econ Health Policy*. 2016;14: 659–672.
- 33 33. Ng SS, Hutubessy R, Chaiyakunapruk N. Systematic review of cost-effectiveness  
34 studies of human papillomavirus (HPV) vaccination: 9-Valent vaccine, gender-neutral  
35 and multiple age cohort vaccination. *Vaccine*. 2018;36: 2529–2544.  
36 doi:10.1016/j.vaccine.2018.03.024
- 37 34. Bertram MY, Lauer JA, De Joncheere K, Edejer T, Hutubessy R, Kieny MP, et al.  
38 Cost-effectiveness thresholds: Pros and cons. *Bull World Health Organ*. 2016;94: 925–  
39 930. doi:10.2471/BLT.15.164418

40

41

42 **Legend Figure**

43

- 1 Figure 1. PRISMA flow-chart for systematic review of studies
- 2
- 3

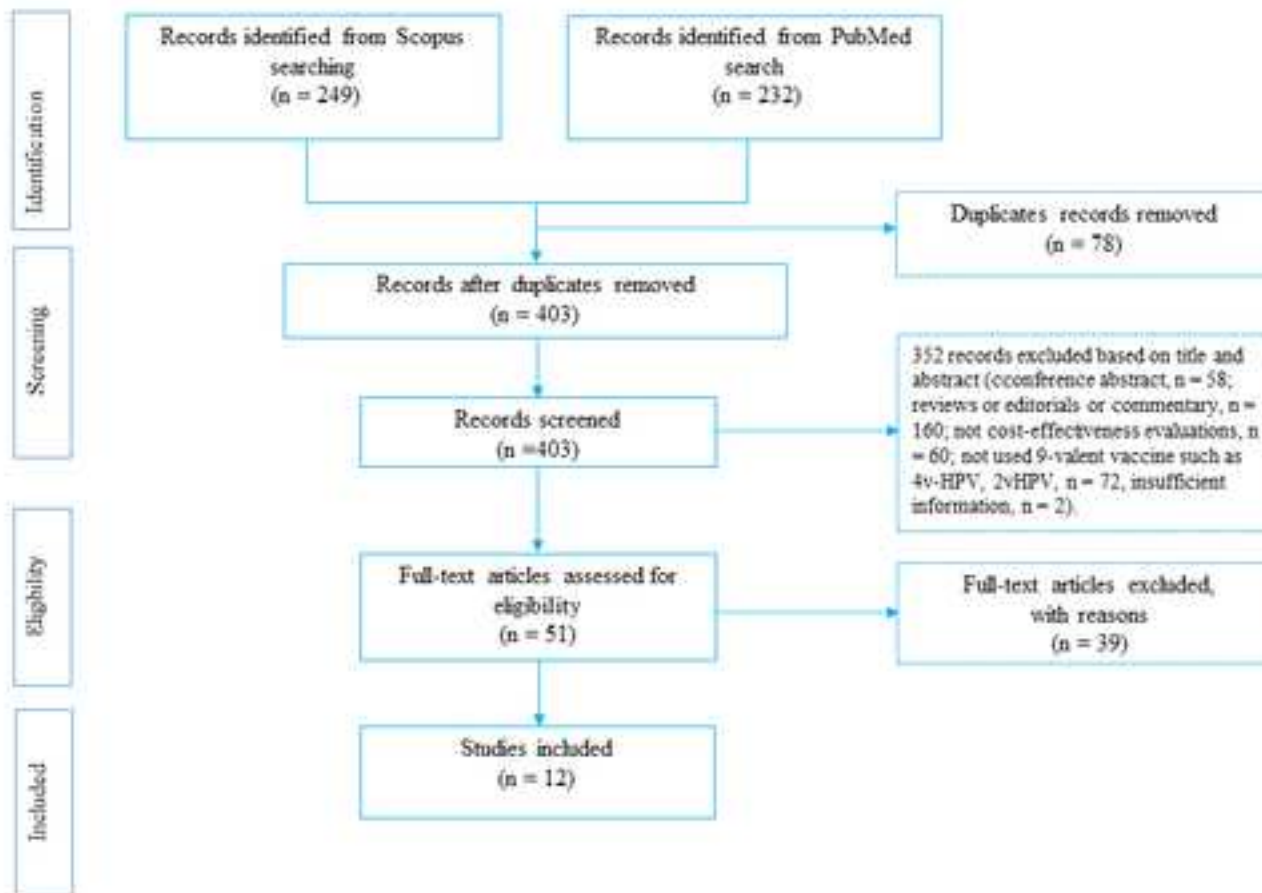



Table 1. Characteristics of twelve included cost-effectiveness of 9-valent vaccine

| Characteristics                                                   | Number of studies (n) | Percentage (%) |
|-------------------------------------------------------------------|-----------------------|----------------|
| Selected articles                                                 | 12                    | 100            |
| Year of publication                                               |                       |                |
| 2014                                                              | 2                     | 17             |
| 2016                                                              | 7                     | 58             |
| 2017                                                              | 2                     | 17             |
| 2018                                                              | 1                     | 8              |
| Name of Journal                                                   |                       |                |
| <i>BMC Infectious Diseases</i>                                    | 2                     | 17             |
| <i>Cost Effectiveness and Resource Allocation</i>                 | 1                     | 8              |
| <i>Expert Review of Pharmacoeconomics &amp; Outcomes Research</i> | 1                     | 8              |
| <i>Human Vaccines &amp; Immunotherapeutics</i>                    | 1                     | 8              |
| <i>International Journal of Cancer</i>                            | 1                     | 8              |
| <i>Lancet Public Health</i>                                       | 1                     | 8              |
| <i>PLOS ONE</i>                                                   | 1                     | 8              |
| <i>The Journal of Infectious Diseases</i>                         | 2                     | 17             |
| <i>Vaccine</i>                                                    | 1                     | 8              |
| <i>Journal of the National Cancer Institute</i>                   | 1                     | 8              |
| Study setting                                                     |                       |                |
| Australia                                                         | 1                     | 8              |
| Austria                                                           | 1                     | 8              |
| Canada                                                            | 1                     | 8              |
| China                                                             | 1                     | 8              |
| Germany                                                           | 1                     | 8              |
| Italy                                                             | 1                     | 8              |
| Kenya and Uganda                                                  | 1                     | 8              |
| United States                                                     | 5                     | 42             |
| Main location of first author                                     |                       |                |
| Research institute                                                | 8                     | 67             |
| Research group                                                    | 1                     | 8              |
| Hospital or University                                            | 3                     | 25             |
| Conflict of interest                                              |                       |                |
| Yes                                                               | 6                     | 50             |
| No                                                                | 6                     | 50             |

Table 2. Characteristics of the selected studies

| Author                  | Study settings   | Economic category | Target age cohort                           | Sex of cohort  | Vaccine delivery route | No of doses | Type of model | Threshold   | Perspective   | Time horizon (year) | Discount rate | Sensitivity analysis | Most sensitive parameter                                                   |
|-------------------------|------------------|-------------------|---------------------------------------------|----------------|------------------------|-------------|---------------|-------------|---------------|---------------------|---------------|----------------------|----------------------------------------------------------------------------|
| Kiatpongsan et al. [29] | Kenya and Uganda | LMIC              | 9 years                                     | Female         | NIP                    | 3           | Static        | GDP and WTP | Societal      | ns                  | 3%            | One-way              | Discount rate                                                              |
| Laprise et al. [25]     | United States    | HI                | 9–14 years                                  | Female         | NIP                    | 2 & 3       | Dynamic       | WTP         | Societal      | 100                 | 3%            | One-way              | Vaccine efficacy, screening method, and healthcare costs, vaccine coverage |
| Largeron et al. [26]    | Germany          | HI                | 12-17 years                                 | Female         | SHI plans              | 2           | Dynamic       | WTP         | Societal      | 100                 | 3%            | One-way              | Discounted rate, vaccine price                                             |
| Mennini et al. [4]      | Italy            | HI                | 12 years                                    | Female         | NIP                    | 2           | Dynamic       | WTP         | Health system | 100                 | 3%            | One-way              | Vaccine price                                                              |
| Mo et al. [21]          | China            | MI                | 12 years                                    | Female         | NIP                    | 3           | Markov        | GDP and WTP | Health system |                     | 3%            | One-way              |                                                                            |
| Simms et al. [28]       | Australia        | HI                | 12 years                                    | Female         | NIP                    | 2           | Dynamic       | WTP         | Health system | 20                  | 5%            | One-way              | Vaccine price and vaccine duration of protection                           |
| Boiron et al. [17]      | Austria          | HI                | 9-year                                      | Gender-neutral | Universal              | 2           | Dynamic       | WTP & GDP   | Health system | 100                 | 3%            | one-way              | Discount rates and duration of protection                                  |
| Brisson et al. [27]     | United States    | HI                | 9-year                                      | Gender-neutral | Universal              | 3           | Dynamic       | WTP         | Societal      | 70                  | 3%            | One-way              | Vaccine price                                                              |
| Chesson et al. [19]     | United States    | HI                | Female: 12 to 26 years, and male:12 to 21 y | Gender-neutral | NIP                    | 3           | Dynamic       | WTP         | Societal      | 100                 | 3%            | one-way              | Vaccine price, Time horizon                                                |
| Chesson et al. [20]     | United States    | HI                | Female:13-18years                           | female         | NIP                    | 3           | Dynamic       | WTP         | Societal      | 100                 | 3%            | One-way, Multi-way   | Vaccine price                                                              |
| Chesson et al. [23]     | United States    | HI                | Female: 12 to 26 years, and male:12 to 21 y | Gender-neutral | NIP                    | 3           | Dynamic       | WTP         | Health system | 100                 | 3%            | One-way, Multi-way   | Vaccine price                                                              |
| Drolet et al. [22]      | Canada           | HI                | 10 years                                    | Female         | NIP                    | 3           | Static        | GDP         | Societal      | 70                  | 3%            | One-way, Multi-way   | Duration of protection, vaccine efficacy, vaccine price, discount rate     |

Note: Statutory health insurance (SHI) plans, NIP = National Immunisation Program, WTP = Willingness to pay,

Table 3. Extent to which included studies met standard reporting recommendations

| Explained recommendations                     | Number of studies fulfilling | Percentage (%) |
|-----------------------------------------------|------------------------------|----------------|
| Research question or objective clearly stated | 10/12                        | 83             |
| Described intervention and comparator         | 10/12                        | 83             |
| Exploration of effectiveness reported         | 11/12                        | 92             |
| <i>Single study-based estimates</i>           | 8/12                         | 67             |
| <i>Synthesis-based estimates</i>              | 10/12                        | 83             |
| Assumption of costs and outcomes specified    | 11/12                        | 92             |
| Currency and price data reported              | 12                           | 100            |
| Choice of model justified                     | 12                           | 100            |
| Perspective specified                         | 12                           | 100            |
| Time horizon specified                        | 12                           | 100            |
| Discounting rates specified                   | 12                           | 100            |
| Calculated and reported ICER or cost-saving   | 12                           | 100            |
| Sensitivity analysis performed                | 11/12                        | 92             |
| Conclusions follow from the data reported     | 12                           | 100            |
| Disclosed funding source(s)                   | 10/12                        | 83             |

Table 4. Summary of the results of the selected studies

| Author                  | Vaccine efficacy | Vaccine coverage             | Duration of vaccine protection | Herd effect | Vaccine price per dose | Unit of cost-effectiveness | GDP per capita                         | Incremental cost-effectiveness ration (ICER)                                                                    | Conclusion or recommendation                                                                   | Study funder                                                                                                                                       |
|-------------------------|------------------|------------------------------|--------------------------------|-------------|------------------------|----------------------------|----------------------------------------|-----------------------------------------------------------------------------------------------------------------|------------------------------------------------------------------------------------------------|----------------------------------------------------------------------------------------------------------------------------------------------------|
| Kiatpongsan et al. [29] | 100%             | 100%                         | Lifetime                       | No          | US\$ 90.25             | QALYs                      | Kenya = \$1,349.97, Uganda = \$ 674.05 | Very cost-effective if additional cost of 9vHPV vaccine per course $\leq$ \$9.8 in Kenya & $\leq$ 8.4 in Uganda | Very cost-effective for both countries (Kenya & Uganda)                                        | The Bill and Melinda Gates Foundation                                                                                                              |
| Laprise et al. [25]     | 95%              | 90%                          | Lifetime                       | No          | US\$ 158               | QALYs                      |                                        | Cost saving to US\$ 500                                                                                         | Cost saving                                                                                    | CDC                                                                                                                                                |
| Largeron et al. [26]    | 96%              | 90%                          | Lifetime                       | No          | € 140                  | QALYs                      | £30,000                                | € 329 / QALY                                                                                                    | Highly cost-effective                                                                          | Sanofi Pasteur MSD (SPMSD).                                                                                                                        |
| Mennini et al. [4]      | 96%              | 90%                          | lifelong                       | No          | € 80.00                | QALYs                      | € 40,000                               | € 10,463 / QALY                                                                                                 | Highly cost-effective                                                                          | Sanofi Pasteur MSD                                                                                                                                 |
| Mo et al. [21]          | 96.7%            | 20%                          | lifetime                       | No          | USD 149.03             | QALYs                      | USD 23,880                             | US\$ 5,768 / QALY                                                                                               | - Highly cost-effective with screening 1 + 9vHPV,<br>- Cost-effective with screening 2 + 9vHPV | The Japan Society for the Promotion of Sciences, the National Centre for Child Health and Development, and the Chinese Natural Sciences Foundation |
| Simms et al. [28]       | 59%              | 70%                          | lifelong                       | No          | ns                     | QALYs                      | AUD 30,000                             | Cost-effectiveness if the additional cost per dose is US\$18–28                                                 | Cost-effectiveness                                                                             | National Health and Medical Research Council, Australia                                                                                            |
| Boiron et al. [17]      | 98%              | Female: 60%,<br>Male: 40%    | Lifelong                       | Yes         | US\$ 147.15            | QALYs                      | US\$ 44,767.35                         | Cost-saving at vaccine price up to US\$ 166.77                                                                  | Cost-saving                                                                                    | Sanofi Pasteur MSD                                                                                                                                 |
| Brisson et al. [27]     | 95.0%            | Not stated                   | Lifelong                       | Yes         | US\$ 158               | QALYs                      | US\$ 48,373.88                         | Cost-saving regardless of cross-protection assumptions                                                          | Cost-saving if additional cost of vaccine per dose < US\$ 13                                   | CDC, Canadian Research Chair Program                                                                                                               |
| Chesson et al. [19]     | 95.0%            | Female: 25.8%<br>Male: 11.7% | Lifelong                       | Yes         | US\$ 162.74            | QALYs                      | US\$ 52,787.03                         | Cost-saving regardless of cross-protection assumptions (<\$0)                                                   | Cost-saving                                                                                    | Not stated                                                                                                                                         |
| Chesson et al. [20]     | 95.0%            | Female: 46%<br>Male : 25%    | Lifelong                       | Yes         | US\$ 162.74            | QALYs                      | US\$ 52,787.03                         | US\$ 111,446 / QALY                                                                                             | Not cost-effective                                                                             | CDC, Canada Research Chair Program, Canadian Institute for Health Research                                                                         |
| Chesson et al. [23]     | 95.0%            | 46%                          | Lifelong                       | Yes         | US\$ 174               | QALYs                      | US\$ 52,787.03                         | US\$ 228,800 / QALY                                                                                             | Not cost-effective                                                                             | Not stated                                                                                                                                         |
| Drolet et al. [22]      | 95.0%            | 80%                          | 20years                        | Yes         | US\$ 90.25             | QALYs                      | US\$ 50,440.44                         | US\$ 11,593 /QALY                                                                                               | Very cost-effective if additional cost of vaccine per dose $\leq$ US\$ 22.80                   | Canadian Research Chair Program                                                                                                                    |

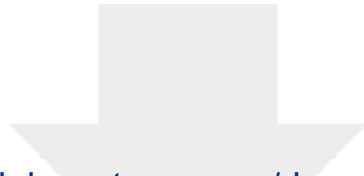

Click here to access/download  
**Supporting Information**  
PRISMA 2009 checklist\_.doc

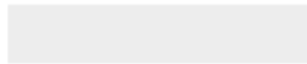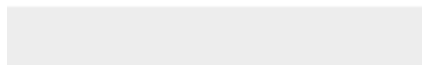

Supplement: pone.0233499.s004.pdf [file pone.0233499.s004.pdf]
